# Supplementary material for: Midazolam Pharmacokinetics in Morbidly Obese Patients Following Semi-Simultaneous Oral and Intravenous Administration: A Comparison with Healthy Volunteers
Source: Springer Nature journal article supplement (doi:10.1007/s40262-014-0166-x), 2014-08-20
Supplement: MOESM4 [file 9340798]

$PROBLEM Final model #61

$INPUT ID TIME AMT RATE DROP DV CMT MDV TAD TADI OBES TBW LBW IBW BMI WHR AGE SEX LOQ IV ROUN

; Parent=run18

$DATA BOTH.occ1.incl.BLOQ.11.csv

$SUBROUTINES ADVAN6 TOL=5

$MODEL

COMP=(PODOSE)

COMP=(CENTRAL)

COMP=(PERIP)

COMP=(PERIP2)

COMP=(TRANSIT1)

COMP=(TRANSIT2)

COMP=(TRANSIT3)

$PK

TVCL= THETA(1)

CL= TVCL*EXP(ETA(1))

TVF1= THETA(2)*THETA(10)**OBES

F1= TVF1*EXP(ETA(2)) ; oral bioavailability

TVV2= THETA(3)*(1+THETA(8)*(TBW-127))

V2= TVV2*EXP(ETA(5)) ; volume (L)

TVQ= THETA(4)

Q= TVQ*EXP(ETA(3)) ; intercompartmental clearance (L/min)

TVV3= THETA(5)*(TBW/127)**THETA(9)

V3= TVV3*EXP(ETA(6)) ; peripheral volume of distribution (L)

TVKA= THETA(6)*THETA(11)**OBES

KA= TVKA*EXP(ETA(4)) ; oral absoprtion rate or Ktr (min-1)

KTR= KA

V4= V3 ; 2nd volume periph. compartment (L)

Q4= THETA(7) ; clearance to 2nd periph. compartment (L/min)

;

S2=V2

S3=V3

;

K15=KA

K56=KTR

K67=KTR

K72=KTR

K20=CL/V2

K23=Q/V2

K32=Q/V3

K24=Q4/V2

K42=Q4/V4

$DES

DADT(1)= -K15*A(1)

DADT(2)= KTR*A(7) -K23*A(2) +K32*A(3) -K24*A(2) +K42*A(4) -K20*A(2)

DADT(3)= K23*A(2) -K32*A(3)

DADT(4)= K24*A(2) -K42*A(4)

DADT(5)= K15*A(1) -KTR*A(5)

DADT(6)= KTR*A(5) -KTR*A(6)

DADT(7)= KTR*A(6) -KTR*A(7)

$ERROR

COM1=0

IF (OBES.EQ.0) COM1=1

COM2=0

IF (OBES.EQ.1) COM2=1

;

IPRED=F ; individual prediction

;

Y1=IPRED*(1+ERR(1)) ; healthy volunteers

Y2=IPRED*(1+ERR(2)) ; morbidly obese patients

;

Y=Y1*COM1+Y2*COM2

;

IRES=DV-IPRED ; individual residual

DEL=0 ; if F=0, than see next lines

IF(IPRED.EQ.0)DEL=1

IWRES=(1-DEL)*IRES/(IPRED+DEL)

$THETA

(0, 0.2) ;CL (L/min)

(0, 0.3) ;F1 healthy volunteers

(0, 30) ;V2 (L)

(0, 0.9) ;Q (L/min)

(0, 100) ;V3 (L)

(0, 0.1) ;KA healthy volunteers

(0, 0.1) ;Q4

(0, 0.003) ;TBW V2

(0, 2) ;TBW V3

(0, 2) ;fraction F1 morbidly obese

(0, 0.5) ;fraction KA morbidly obese

;

$OMEGA

0.03 ;CL

0.1 ;F1

0 FIX ;Q

0.2 ;KA

$OMEGA BLOCK(2)

0.3 ;V2 (central)

0.05 0.1 ;V3 (peripheral)

;

$SIGMA

0.005 ; healthy volunteers

0.1 ; morbidly obese

$EST SIGDIG=3 MAXEVAL=9999 PRINT=5 NOABORT METHOD=1 INTERACTION POSTHOC

$COV COMP

$TABLE ID TIME TAD TADI IPRED IWRES CWRES CMT ROUN OBES IV NOPRINT ONEHEADER FILE=sdtab61

$TABLE ID TAD CMT TADI ROUN OBES IV CL V2 Q V3 Q4 KA F1 V4 TBW LBW IBW AGE BMI WHR ETA(1) ETA(2) ETA(3) ETA(4) ETA(5) ETA(6) NOPRINT NOAPPEND ONEHEADER FILE=patab61

$TABLE ID TAD TADI TBW LBW IBW BMI WHR AGE SEX NOPRINT NOAPPEND ONEHEADER FILE=cotab61
